# Supplementary material for: Aspirin might reduce the incidence of pancreatic cancer: A meta-analysis of observational studies
Source: PubMed Central journal article supplement (PMC4614261; doi:10.1038/srep15460), 2015-10-21
Supplement: srep15460-s1.pdf [file srep15460-s1.pdf]

# **Aspirin might reduce the incidence of pancreatic cancer: a meta-analysis of observational studies**

Yan-Peng Zhang<sup>1</sup>, You-Dong Wan<sup>2</sup>, Yu-Ling Sun<sup>1\*</sup>, Jian Li<sup>1</sup>, Rong-Tao Zhu<sup>1</sup>

## **Affiliations:**

<sup>1</sup>Institute of Hepatobiliary and Pancreatic Diseases, Zhengzhou University, Department of Hepatobiliary and Pancreatic Surgery, The First Affiliated Hospital of Zhengzhou University, School of Medicine, Zhengzhou, P. R. China;

<sup>2</sup>Department of Integrated Intensive Care Unit, the First Affiliated Hospital, Zhengzhou University, Zhengzhou, China;

**\*Correspondence:** Dr. Yu-Ling Sun, Institute of Hepatobiliary and Pancreatic Diseases, Zhengzhou University, Department of Hepatobiliary and Pancreatic Surgery, The First Affiliated Hospital of Zhengzhou University, School of Medicine, 1 Jianshe Road, Zhengzhou 450052, P.R. China; Telephone: +86 037167967126, Email: [ylsun@zzu.edu.cn](mailto:ylsun@zzu.edu.cn).

**Supplementary Table S1.** Methodological quality assessment (risk of bias) of included studies by Newcastle-Ottawa Scales.

| Study                     | Selection                        |                                             |                                                   |                                              | Comparability | Outcome               |                                          |                                           | Total score |
|---------------------------|----------------------------------|---------------------------------------------|---------------------------------------------------|----------------------------------------------|---------------|-----------------------|------------------------------------------|-------------------------------------------|-------------|
|                           | Exposed Cohort / Case Definition | Nonexposed Cohort / Case Representativeness | Ascertainment of Exposure / Selection of Controls | Outcome of Interest / Definition of Controls |               | Assessment of Outcome | Length of Follow-up / Same Ascertainment | Adequacy of Follow-up / Non-Response rate |             |
| Streicher et al. /2014    | *                                | *                                           | *                                                 | *                                            | **            | *                     | *                                        | -                                         | 8           |
| Jacobs et al. /2012       | *                                | *                                           | *                                                 | *                                            | *             | *                     | *                                        | *                                         | 8           |
| Tan et al. /2011          | *                                | *                                           | -                                                 | *                                            | *             | *                     | *                                        | -                                         | 6           |
| Pugh et al. /2011         | *                                | *                                           | -                                                 | *                                            | *             | *                     | *                                        | -                                         | 6           |
| Bradley et al. /2010      | *                                | *                                           | *                                                 | -                                            | **            | *                     | *                                        | -                                         | 7           |
| Bonifazi et al. /2010     | *                                | *                                           | -                                                 | *                                            | **            | *                     | *                                        | *                                         | 8           |
| Schernhammer et al. /2004 | *                                | *                                           | *                                                 | *                                            | *             | *                     | *                                        | -                                         | 7           |
| Ratnasinghe et al. /2004  | *                                | *                                           | *                                                 | *                                            | **            | *                     | *                                        | *                                         | 9           |
| Anderson et al. /2002     | -                                | *                                           | *                                                 | *                                            | **            | *                     | *                                        | -                                         | 7           |
| Menezes et al. /2002      | *                                | *                                           | -                                                 | *                                            | *             | *                     | *                                        | -                                         | 6           |
| Langman et al. /2000      | *                                | *                                           | -                                                 | *                                            | **            | *                     | *                                        | *                                         | 8           |
| Coogan et al. /2000       | *                                | *                                           | -                                                 | *                                            | *             | *                     | *                                        | -                                         | 6           |
